# Supplementary material for: Fiber-Rich Barley Increases Butyric Acid-Producing Bacteria in the Human Gut Microbiota
Source: MDPI journal article supplement (doi:10.3390/metabo11080559), 2021-08-22
Supplement: s1 [file s1]

Supplementary Material

# Fiber-Rich Barley Increases Butyric Acid-Producing Bacteria in the Human Gut Microbiota

Shohei Akagawa <sup>1</sup>, Yuko Akagawa <sup>1</sup>, Yoko Nakai <sup>1</sup>, Mitsuru Yamagishi <sup>1</sup>, Sohsaku Yamanouchi <sup>1</sup>, Takahisa Kimata <sup>1</sup>, Kazushige Chino <sup>2</sup>, Taiga Tamiya <sup>3</sup>, Masaki Hashiyada <sup>4</sup>, Atsushi Akane <sup>4</sup>, Shoji Tsuji <sup>1</sup> and Kazunari Kaneko <sup>1,\*</sup>

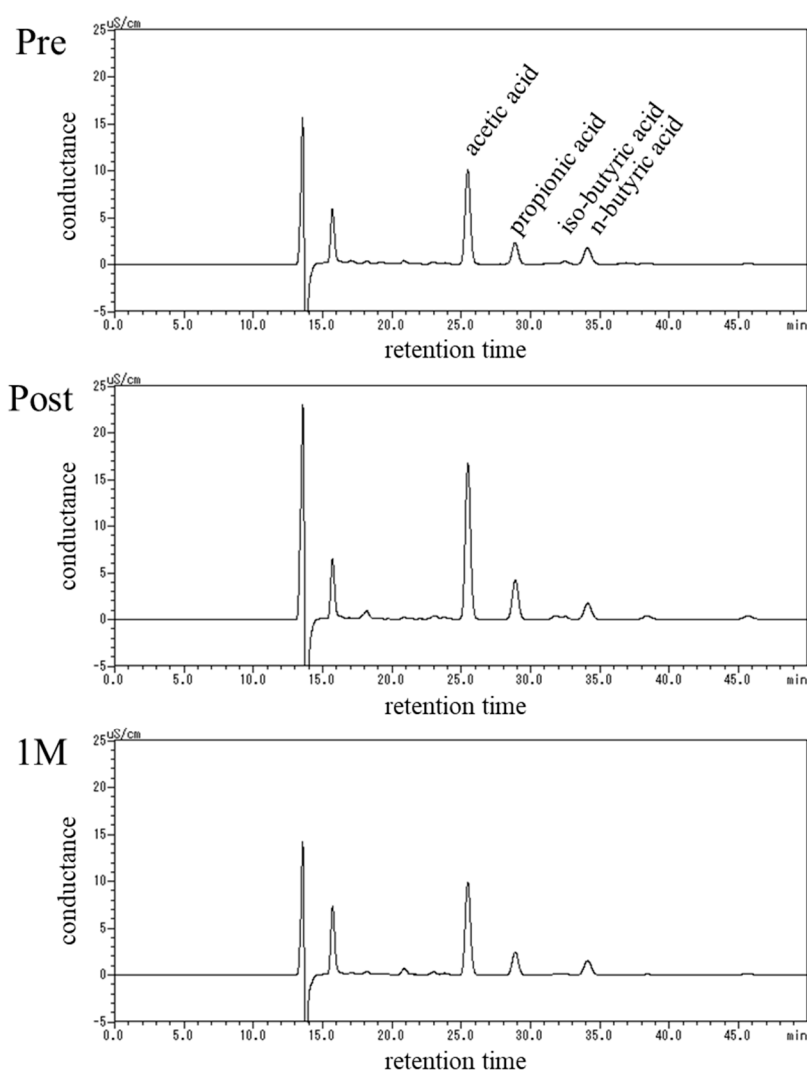

**Figure S1.** Representative chromatograms of short chain fatty acids at the three time points (pre, post, and 1 month) in one participant using high performance liquid chromatography.
